# Supplementary material for: Hyaluronic Acid Combined with Serum Rich in Growth Factors in Corneal Epithelial Defects
Source: PubMed Central journal article supplement (PMC6480555; doi:10.3390/ijms20071655), 2019-04-03
Supplement: ijms-20-01655-s001.pdf [file ijms-20-01655-s001.pdf]

**Table S1.** Treatments for the culture of RPCE and HCE cells for in vitro assays.

| Treatments                        | Components                                                                           |
|-----------------------------------|--------------------------------------------------------------------------------------|
| BSA-synchronizer                  | DMEM:F12 + 2 mM L-Glutamine + 1% Penicillin/Streptomycin + 1% BSA                    |
| 1% BSA (negative control)         | DMEM:F12 + 2 mM L-Glutamine + 1% Penicillin/Streptomycin + Supplements* + 1% BSA     |
| 10% FBS medium (positive control) | DMEM:F12 + 2 mM L-Glutamine + 1% Penicillin/Streptomycin + Supplements* + 10% FBS    |
| 45% s-PRGF                        | DMEM:F12 + 2 mM L-Glutamine + 1% Penicillin/Streptomycin + Supplements* + 45% s-PRGF |
| 0.1% NaHA medium                  | DMEM:F12 + 2 mM L-Glutamine + 1% Penicillin/Streptomycin + Supplements* + 0.1% NaHA  |

\* Supplements for RPCE cells: 10 ng/mL EGF + 5  $\mu$ L/mL insulin + 0.1  $\mu$ L/mL cholera toxin. Supplements for HCE cells: 10 ng/mL EGF + 5  $\mu$ L/mL Insulin + 0.1  $\mu$ L/mL cholera toxin + 0.5% DMSO.

**Table S2.** Immunohistochemical analysis conditions.

| Marker                                                     | Commercial company         | Dilution | Fixation | Permeabilization  | Secondary antibody                                  |
|------------------------------------------------------------|----------------------------|----------|----------|-------------------|-----------------------------------------------------|
| <b>Cytokeratin k3/k76</b>                                  | Millipore (Ref: CBL218)    | 1:50     | 2% PAF   | PBS + 0.5% Triton | Alexa Fluor 568 goat anti-mouse IgG1 (Ref: A21124)  |
| <b>Cytokeratin k15</b>                                     | Santa Cruz (Ref: sc-47697) | 1:50     | 2% PAF   | PBS + 0.5% Triton | Alexa Fluor 488 goat anti-mouse IgG2a (Ref: A21131) |
| <b>Alpha smooth muscle actin (<math>\alpha</math> SMA)</b> | Abcam (Ref: ab7817)        | 1:400    | 2% PAF   | PBS + 0.5% Triton | Alexa Fluor 488 goat anti-mouse IgG2a (Ref: A21131) |
| <b>Integrin beta 4</b>                                     | Abcam (Ref: ab29042)       | 1:20     | Acetone  | NO                | Alexa Fluor 568 goat anti-mouse IgG1 (Ref: A21124)  |
| <b>Ki-67</b>                                               | Millipore (Ref: MAB4190)   | 1:20     | Acetone  | NO                | Alexa Fluor 568 goat anti-mouse IgG1 (Ref: A21124)  |
| <b>ZO-1</b>                                                | Abcam (Ref: ab190085)      | 1:20     | Acetone  | NO                | Alexa Fluor 568 donkey anti-goat IgG (Ref: A11057)  |
| <b>Vimentin</b>                                            | Abcam (Ref: ab16700)       | 1:1000   | 2% PAF   | PBS + 0.5% Triton | Alexa Fluor 488 goat anti-rabbit IgG (Ref: A11070)  |

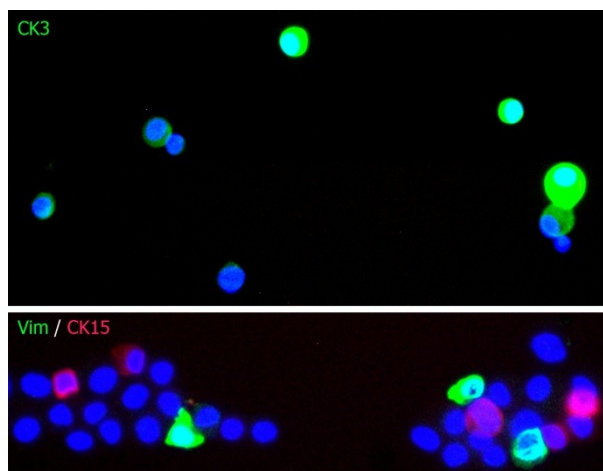

**Figure S1.** Fluorescent immunostaining of primary cultures. Cells were positive for the CK3 corneal epithelial and the CK15 corneal epithelial progenitor markers. Some cells were positive for the vimentin marker, which stains stromal mesenchymal cells as well as stem/progenitor epithelial corneal cells. Magnification 200 $\times$ .
